# Supplementary material for: Disease Monitoring and Health Campaign Evaluation Using Google Search Activities for HIV and AIDS, Stroke, Colorectal Cancer, and Marijuana Use in Canada: A Retrospective Observational Study
Source: PubMed Central journal article supplement (PMC5081479; doi:10.2196/publichealth.6504), 2016-10-12
Supplement: publichealth_v2i2e156_app2.pdf [file publichealth_v2i2e156_app2.pdf]

**Multimedia Appendix 2:** Results from joinpoint analysis for colorectal cancer

| Statistical outputs                                     | 5 week period        | 10 week period                            | 15 week period            |
|---------------------------------------------------------|----------------------|-------------------------------------------|---------------------------|
| <b>Segment 1 (week)</b>                                 | 1-3                  | 1-12                                      | 1-14                      |
| Slope, RSV <sup>a</sup> /week<br>(95% CI)               | 9.86 (7.7 to 12.0)   | 2.22 (2.1 to 2.3)<br>-0.27 (-0.4 to -0.2) |                           |
| <i>P</i> value <sup>b</sup>                             | .14                  | <.001                                     | .50                       |
| <b>Segment 2 (week)</b>                                 | 3-12                 | 12-23                                     | 14-22                     |
| Slope, RSV/week<br>(95% CI)                             | 0.21 (0.03 to 0.4)   | -1.62 (-1.7 to -1.5)                      | 0.04 (-0.1 to 0.2)        |
| <i>P</i> value <sup>b</sup>                             | .54                  | <.001                                     | .95                       |
| <b>Segment 3 (week)</b>                                 | 12-15                | 23-46                                     | 22-25                     |
| Slope, RSV/week<br>(95% CI)<br>-5.00 (-7.11 to<br>-2.6) | 0.07 (0.04 to 0.10)  | -4.59 (-6.2 to -3.0)                      |                           |
| <i>P</i> value <sup>b</sup>                             | .45                  | .58                                       | .45                       |
| <b>Segment 4 (week)</b>                                 | 15-36                | —                                         | 25-56                     |
| Slope, RSV/week<br>(95% CI)                             | 0.01 (-0.03 to 0.05) | —                                         | -0.07 (-0.09 to<br>-0.05) |
| <i>P</i> value <sup>b</sup>                             | .97                  | —                                         | .35                       |

<sup>a</sup>RSV: relative search volume.

<sup>b</sup>Statistical significance was defined as  $P < .05$ .
