# Supplementary material for: Disease Monitoring and Health Campaign Evaluation Using Google Search Activities for HIV and AIDS, Stroke, Colorectal Cancer, and Marijuana Use in Canada: A Retrospective Observational Study
Source: PubMed Central journal article supplement (PMC5081479; doi:10.2196/publichealth.6504), 2016-10-12
Supplement: publichealth_v2i2e156_app3.pdf [file publichealth_v2i2e156_app3.pdf]

**Multimedia Appendix 3:** Results from joinpoint analysis for stroke

| Statistical outputs                       | 5 week period              | 10 week period                               | 15 week period            |
|-------------------------------------------|----------------------------|----------------------------------------------|---------------------------|
| <b>Segment 1 (week)</b>                   | 1-3                        | 1-4                                          | 1-9                       |
| Slope, RSV <sup>a</sup> /week<br>(95% CI) | -12.87 (-14.3 to<br>-11.5) | -2.29 (-3.1 to -1.5)<br>-0.32 (-0.5 to -0.2) |                           |
| <i>P</i> value <sup>b</sup>               | .002                       | .38                                          | .51                       |
| <b>Segment 2 (week)</b>                   | 3-13                       | 4-7                                          | 9-12                      |
| Slope, RSV/week<br>(95% CI)               | -1.33 (-1.4 to -1.2)       | 12.62 (10.8 to 14.5)                         | 11.63 (10.2 to 13.0)      |
| <i>P</i> value <sup>b</sup>               | 0.001                      | .04                                          | .03                       |
| <b>Segment 3 (week)</b>                   | 13-27                      | 7-10                                         | 12-15                     |
| Slope, RSV/week<br>(95% CI)               | -8.54 (-10.4 to -6.7)      | -7.92 (-9.9 to -6.5)                         |                           |
| 0.15 (0.1 to 0.2)                         |                            |                                              |                           |
| <i>P</i> value <sup>b</sup>               | .22                        | .15                                          | 0.13                      |
| <b>Segment 4 (week)</b>                   | —                          | 10-37                                        | 15-47                     |
| Slope, RSV/week<br>(95% CI)               | —                          | -0.28 (-0.3 to -0.3)                         | -0.38 (-0.49 to<br>-0.37) |
| <i>P</i> value <sup>b</sup>               | —                          | <.001                                        | <0.001                    |

<sup>a</sup>RSV: relative search volume.

<sup>b</sup>Statistical significance was defined as  $P < .05$ .
