# Supplementary material for: Disease Monitoring and Health Campaign Evaluation Using Google Search Activities for HIV and AIDS, Stroke, Colorectal Cancer, and Marijuana Use in Canada: A Retrospective Observational Study
Source: PubMed Central journal article supplement (PMC5081479; doi:10.2196/publichealth.6504), 2016-10-12
Supplement: publichealth_v2i2e156_app4.pdf [file publichealth_v2i2e156_app4.pdf]

**Multimedia Appendix 4:** Results from joinpoint analysis for marijuana use

| Statistical outputs                              | 5 week period           | 10 week period                               | 15 week period    |
|--------------------------------------------------|-------------------------|----------------------------------------------|-------------------|
| <b>Segment 1 (week)</b>                          | 1-14                    | 1-18                                         | 1-11              |
| Slope, RSV <sup>a</sup> /week<br>(95% CI)        | 1.13 (1.1 to 1.2)       | 0.83 (0.8 to 0.9)<br>-0.15 (-0.3 to<br>-0.1) |                   |
| <i>P</i> value <sup>b</sup>                      | <.001                   | <.001                                        | 0.60              |
| <b>Segment 2 (week)</b>                          | 14-18                   | 18-22                                        | 11-23             |
| Slope, RSV/week<br>(95% CI)                      | -3.81 (-4.1 to<br>-3.5) | -3.50 (-3.9 to<br>-3.1)                      | 1.09 (1.0 to 1.2) |
| <i>P</i> value <sup>b</sup>                      | <.001                   | .003                                         | <.001             |
| <b>Segment 3 (week)</b>                          | 18-21                   | 22-25                                        | 23-26             |
| Slope, RSV/week<br>(95% CI)<br>4.08 (3.4 to 4.7) | 3.61 (3.0 to 4.2)       | -3.31 (-4.5 to<br>-2.1)                      |                   |
| <i>P</i> value <sup>b</sup>                      | .03                     | .06                                          | 0.34              |
| <b>Segment 4 (week)</b>                          | 21-24                   | 25-33                                        | 26-43             |
| Slope, RSV/week<br>(95% CI)                      | -1.57 (-1.9 to -1.3)    | -0.13 (-0.2 to<br>-0.02)                     | 0.46 (0.4 to 0.5) |
| <i>P</i> value <sup>b</sup>                      | .06                     | 0.67                                         | <.001             |

<sup>a</sup>RSV: relative search volume.

<sup>b</sup>Statistical significance was defined as  $P < .05$ .
