# Supplementary material for: Disease Monitoring and Health Campaign Evaluation Using Google Search Activities for HIV and AIDS, Stroke, Colorectal Cancer, and Marijuana Use in Canada: A Retrospective Observational Study
Source: PubMed Central journal article supplement (PMC5081479; doi:10.2196/publichealth.6504), 2016-10-12
Supplement: publichealth_v2i2e156_app5.pdf [file publichealth_v2i2e156_app5.pdf]

**Multimedia Appendix 5:** Results from joinpoint analysis for HIV<sup>a</sup> and AIDS<sup>b</sup>

| Statistical outputs                       | 5 week period              | 10 week period                                       | 15 week period |
|-------------------------------------------|----------------------------|------------------------------------------------------|----------------|
| <b>Segment 1 (week)</b>                   | 1-67                       | 1-77                                                 | 1-87           |
| Slope, RSV <sup>c</sup> /week<br>(95% CI) | -0.07 (-0.01 to<br>-0.002) | -0.06 (-0.1 to -0.05)<br>-0.05 (-0.045 to<br>-0.049) |                |
| <i>P</i> value <sup>d</sup>               | .001                       | <.001                                                | <.001          |

<sup>a</sup>HIV: human immunodeficiency virus.

<sup>b</sup>AIDS: acquired immunodeficiency syndrome.

<sup>c</sup>RSV: relative search volume.

<sup>d</sup>Statistical significance was defined as  $P < .05$ .
